# Supplementary material for: A Perspective on the Impact of Grassland Degradation on Ecosystem Services for the Purpose of Sustainable Management
Source: MDPI journal article supplement (doi:10.3390/rs14205120), 2022-10-13
Supplement: s1 [file s1]

Archive with 1 entries (1 files):
- remotesensing-1928636-supplementary.pdf
